# Supplementary material
Source: PubMed Central journal article supplement (PMC6201060)
Supplement: zac011187610s1.pdf [file zac011187610s1.pdf]

## A. Raw data for FK506

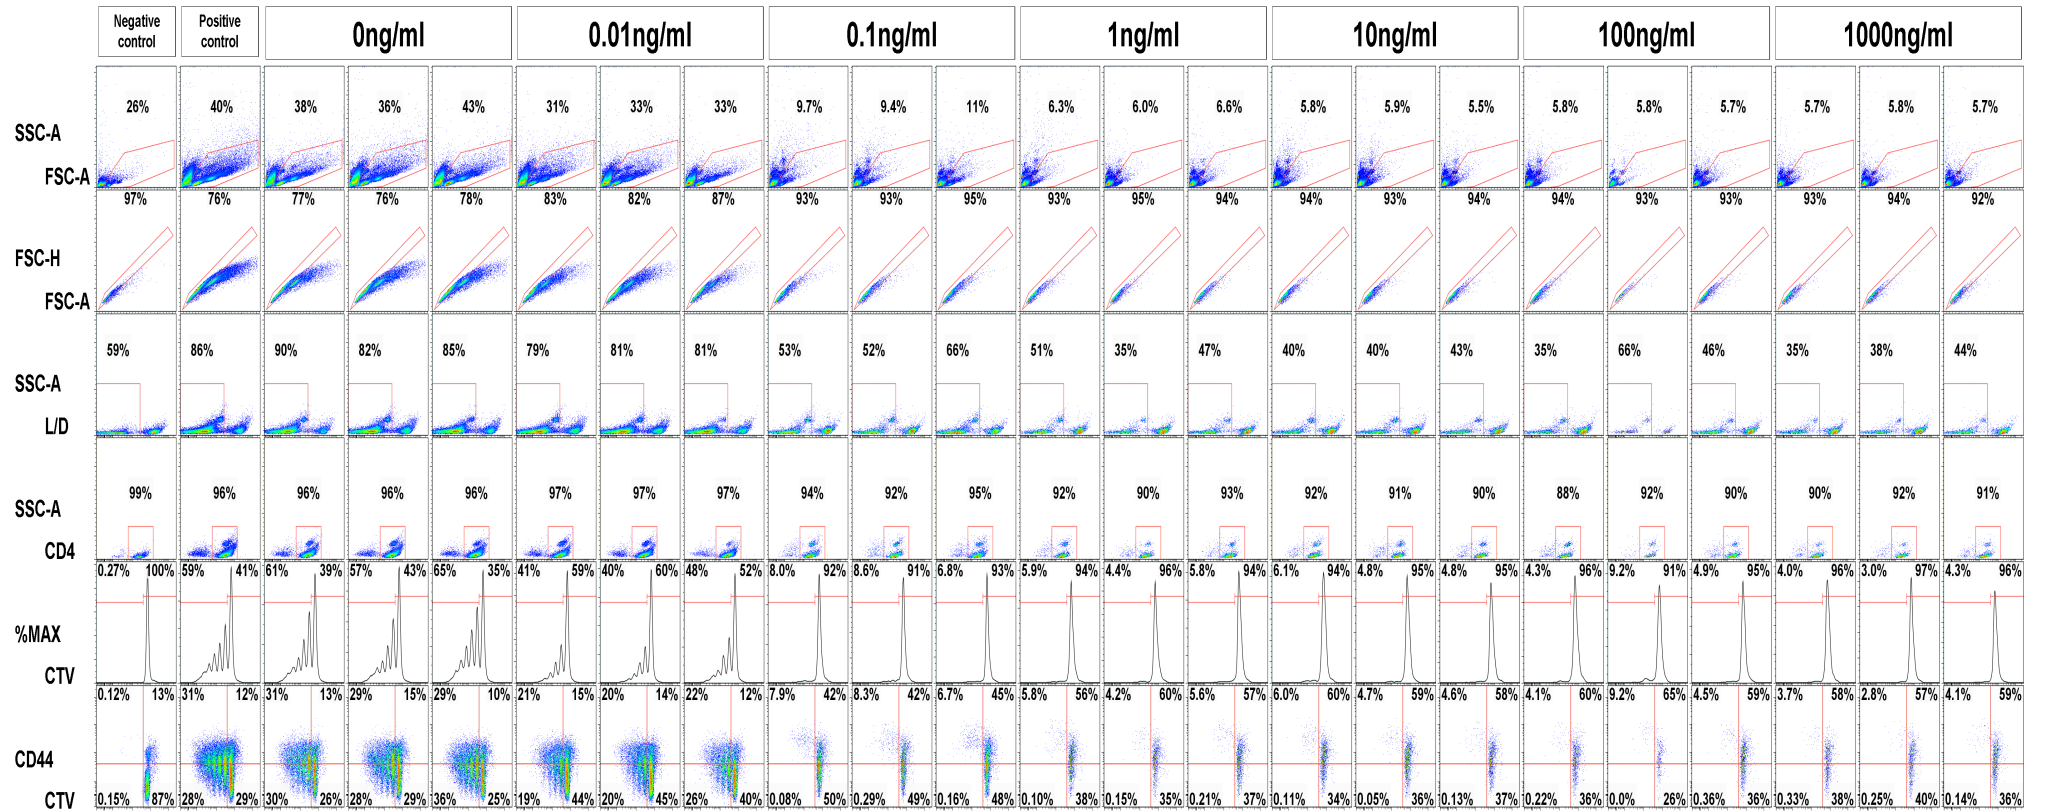

## B. Raw data for 9-deoxo-FK506 (9D-FK506)

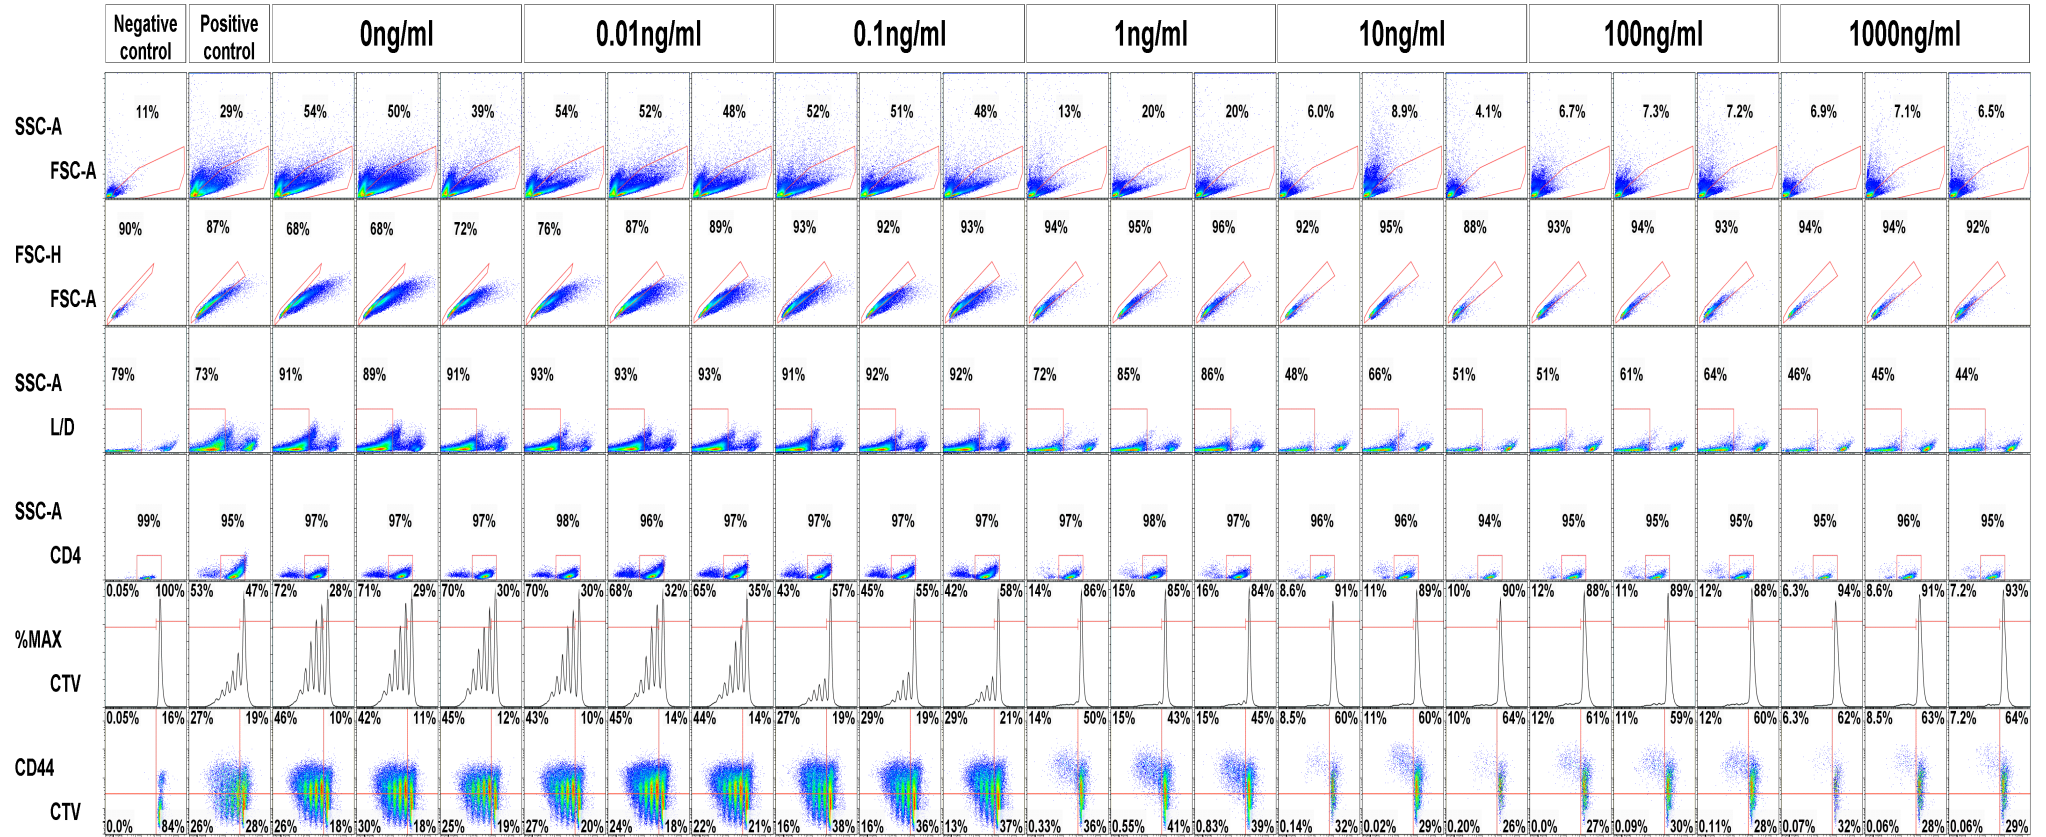

### C. Raw data for 9-deoxy-31-O-demethyl-FK506 (9D31OD-FK506)

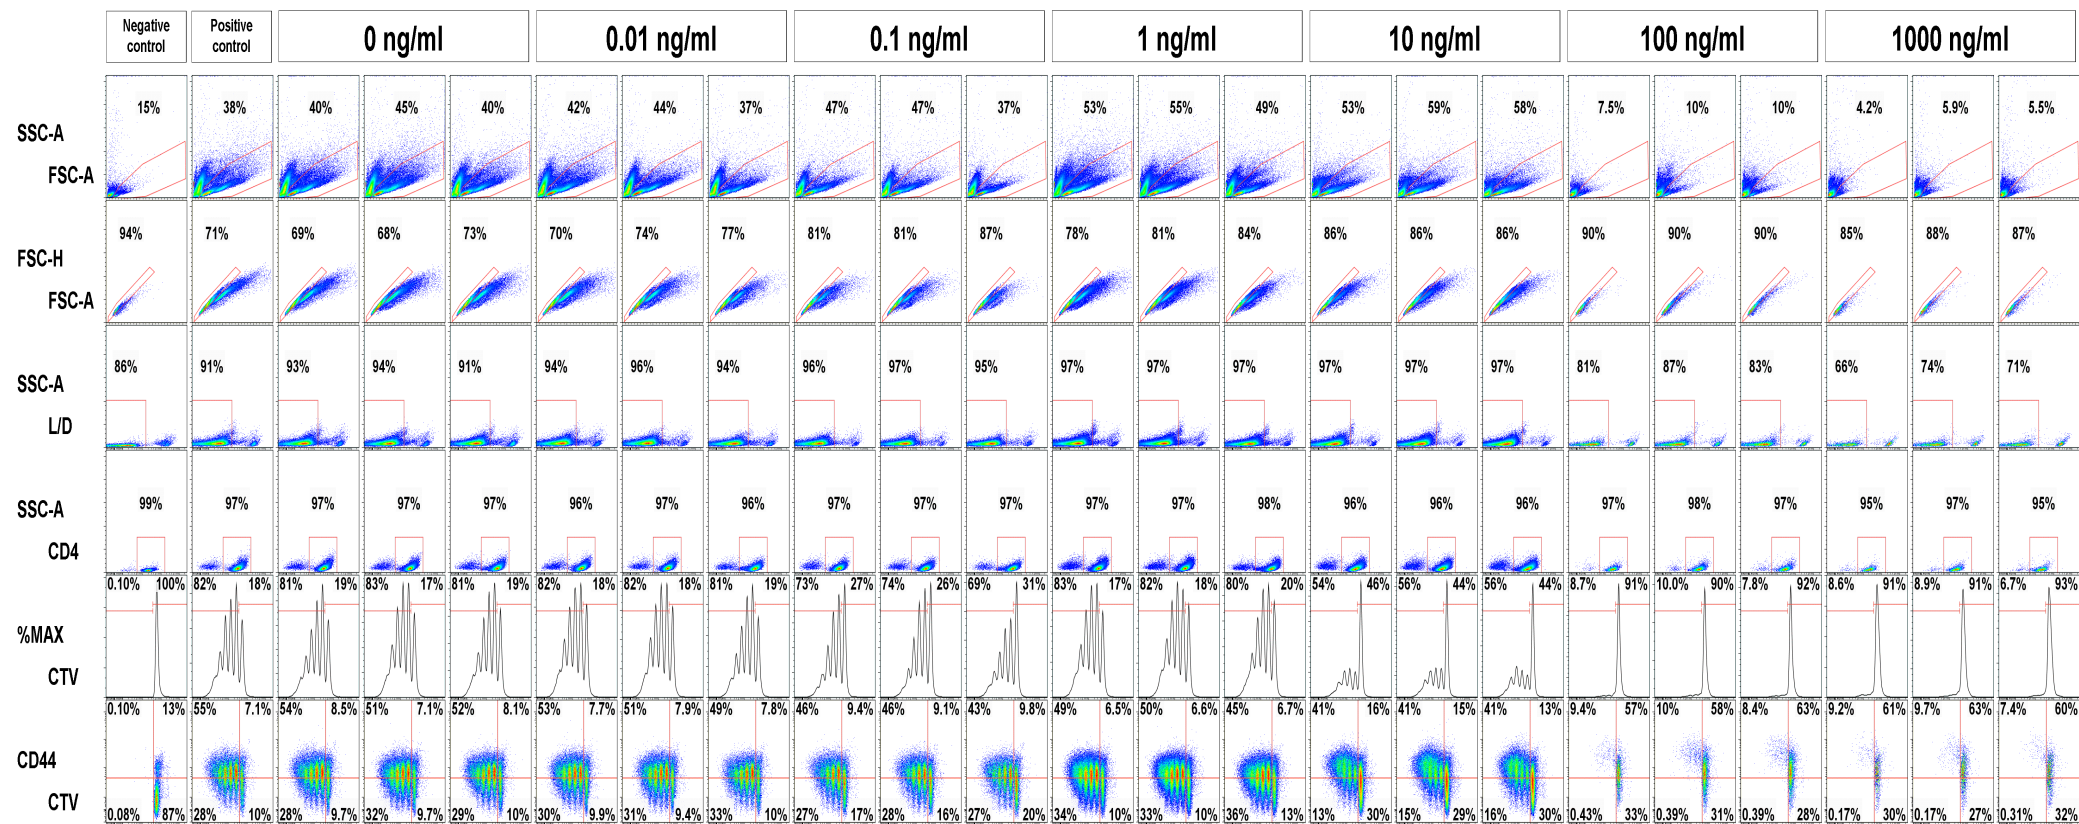

### D. Raw data for 9-deoxy-prolyl-FK506 (9DP-FK506)

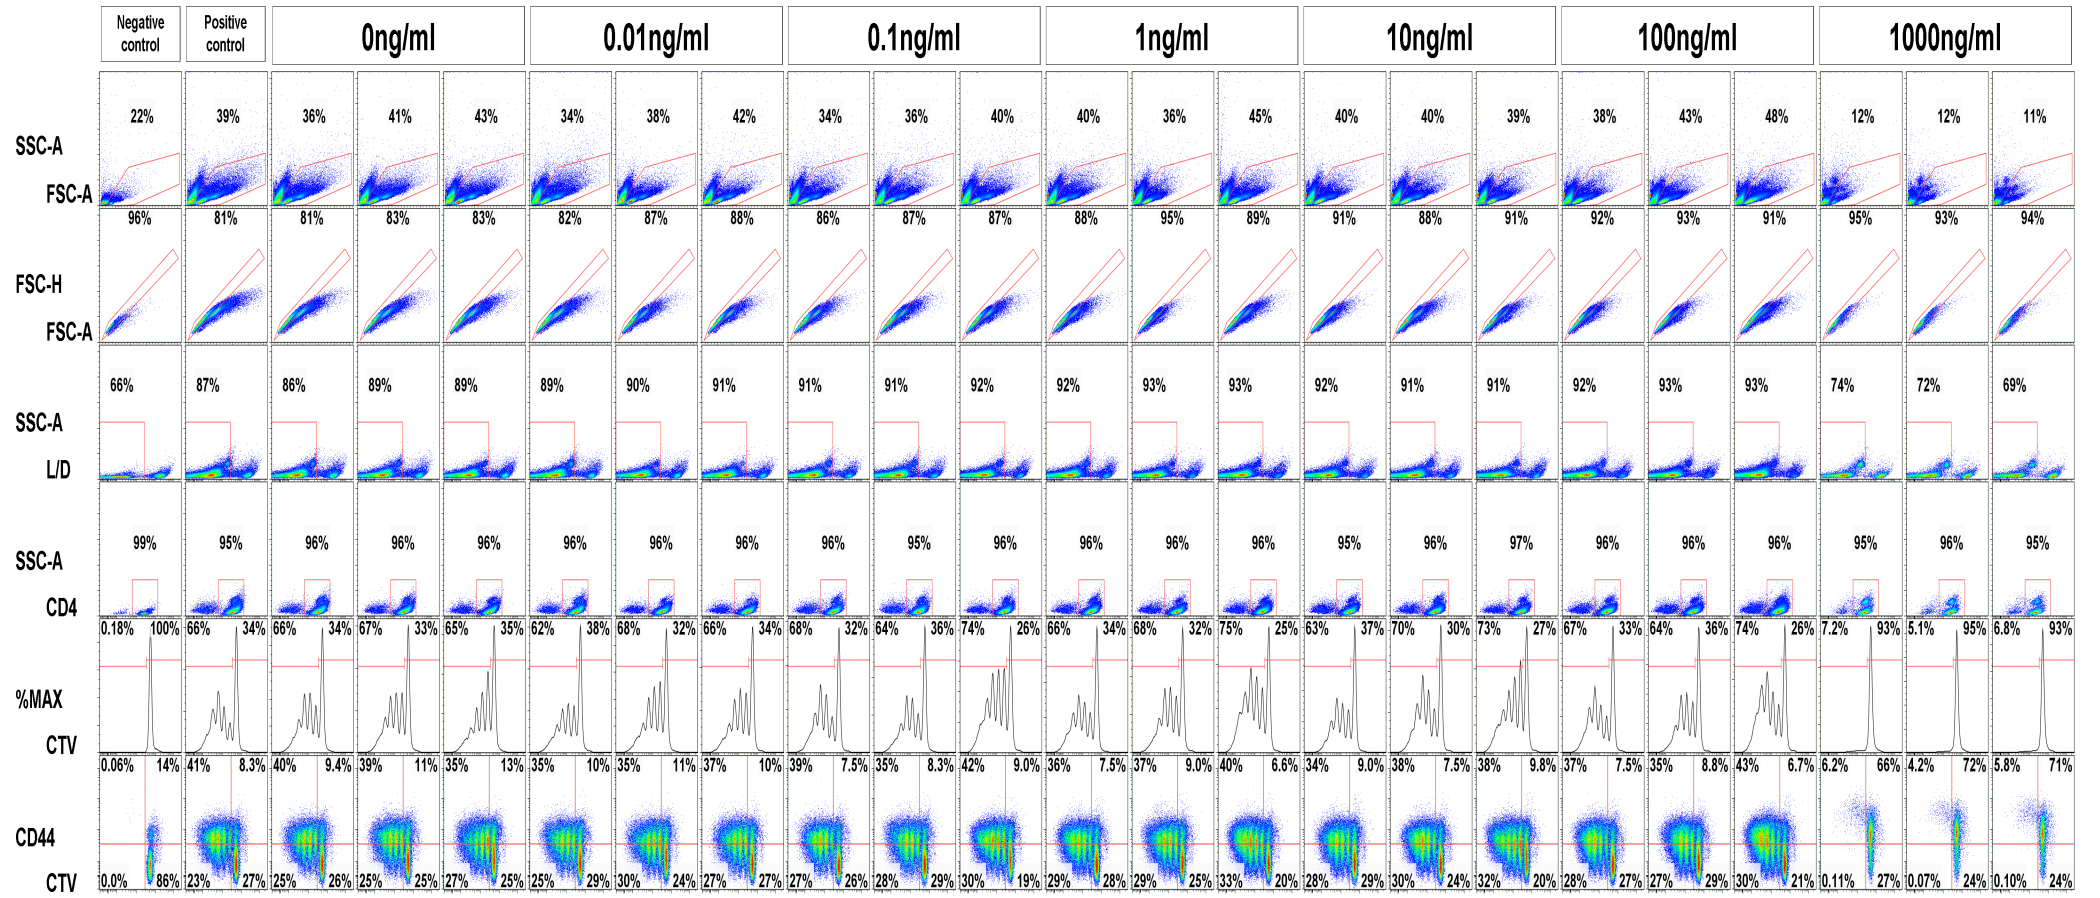

### E. Raw data for 31-O-demethyl-FK506 (31OD-FK506)

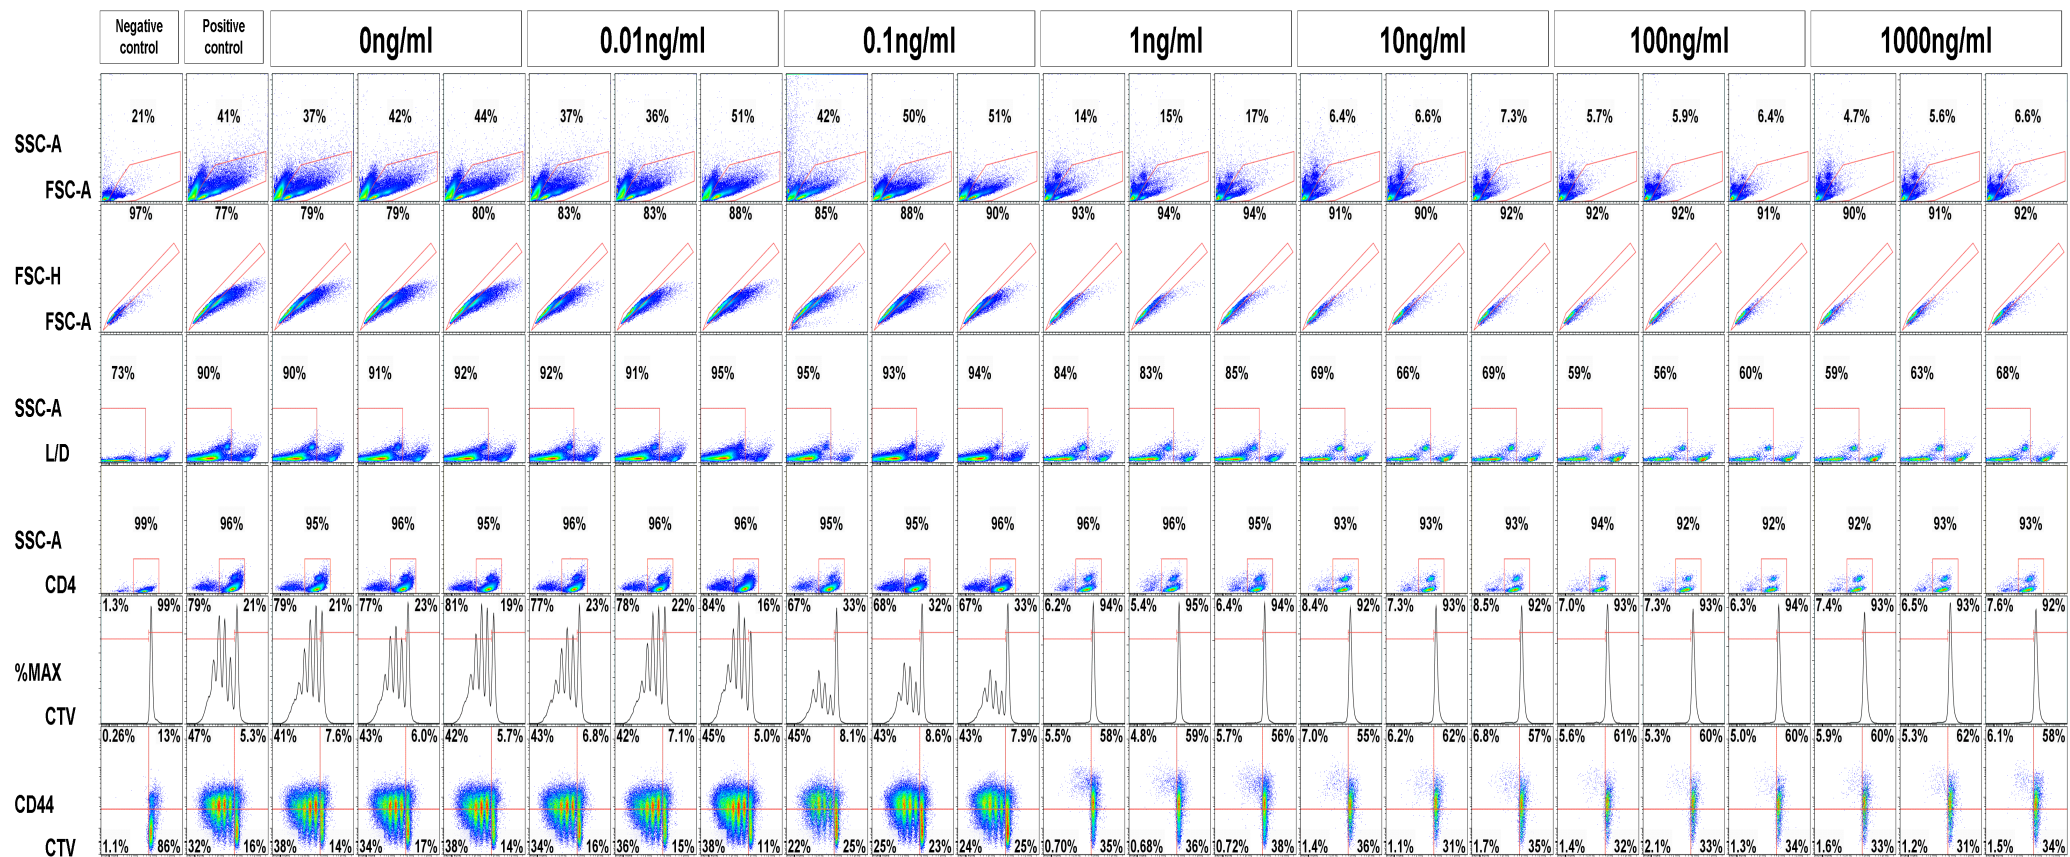

**Figure S1. Raw data for the cytotoxicity and immunosuppressive effect of FK506 and FK506 analogs.** The one representative set of raw FACS data for the cytotoxicity and immunosuppressive effect of FK506 (A), 9-deoxo-FK506 (9D-FK506) (B), 9-deoxo-31-*O*-demethyl-FK506 (9D31OD-FK506) (C), 9-deoxo-propyl-FK506 (9DP-FK506) (D), and 31-*O*-demethyl-FK506 (31OD-FK506) (E) on the activated T-cells was shown. We repeated the experiments three times independently to get the cell cytotoxicity value and IC-50 curves shown in Figure 2B and 2D. Immunosuppressive effect of FK506 and the FK506 analogs on primary CD4<sup>+</sup> T helper cells was assessed at various concentrations of FK506 and the FK506 analogs with three replicates using flow cytometry. (First row) Lymphocytes were selected within the boundaries from the forward scatter area (FSC-A) and side scatter area (SSC-A); (2nd row) single cells (within the red box) were selected from the forward scatter height (FSC-H) and forward scatter area (FSC-A) for further analysis; (3rd row) Primary cultured T cells from mice were stained with LIVE/DEAD™ cell viability kits and the percentage of live cells was determined in the presence of various concentrations of FK506; (4th row) CD4<sup>+</sup> helper T cells were isolated with CD4 T cell enrichment kits; (5th and 6th rows) Cell Trace™ Violet (CTV) was used to dye the cells immediately following culture, and intensity levels were measured to detect proliferation after 72 hours of drug exposure. The assay included a negative control group with inactivated T cells (NC), a positive control group with activated T cells (PC), and a vehicle group with activated T cells and a concentration of 0 µg/ml. The experiment performed with three replicates for each concentration of each FK506 analog compound tested across a range of concentrations. Multiple peaks indicating the proliferation of T cells diminished at concentrations associated with immune suppression. The percentage of proliferated cells within each group was normalized to that with the vehicle.

**Table S1. *C. neoformans*, *C. albicans* and *A. fumigatus* strains used in this study**

| Strain    | ATCC number        | Species              | Genotype                                                   | Reference  |
|-----------|--------------------|----------------------|------------------------------------------------------------|------------|
| H99       | 208821             | <i>C. neoformans</i> | <i>MAT<math>\alpha</math></i>                              | (1)        |
| 46.F.5.02 | (Tanzania isolate) | <i>C. neoformans</i> |                                                            | (2)        |
| 78.7.98   | (Tanzania isolate) | <i>C. neoformans</i> |                                                            | (2)        |
| BT63      | (Botswana isolate) | <i>C. neoformans</i> |                                                            | (2)        |
| BT130     | (Botswana isolate) | <i>C. neoformans</i> |                                                            | (2)        |
| S25C      | (Asia isolate)     | <i>C. neoformans</i> |                                                            | (2)        |
| S25J      | (Asia isolate)     | <i>C. neoformans</i> |                                                            | (2)        |
| KCCM50544 | 2344               | <i>C. neoformans</i> |                                                            | (3)        |
| KCCM50564 | 32045              | <i>C. neoformans</i> |                                                            | (4)        |
| YSB64     |                    | <i>C. neoformans</i> | <i>MAT<math>\alpha</math> hog1<math>\Delta</math>::NAT</i> | (2)        |
| YSB549    |                    | <i>C. neoformans</i> | <i>MAT<math>\alpha</math> ire1<math>\Delta</math>::NAT</i> | (5)        |
| M049      |                    | <i>C. neoformans</i> | <i>ade2<math>\Delta</math></i> derivative of H99           | (6)        |
| MCC1      |                    | <i>C. neoformans</i> | <i>frr1::ADE2</i> of M049                                  | (6)        |
| KK1       |                    | <i>C. neoformans</i> | <i>MAT<math>\alpha</math> cna1<math>\Delta</math>::NAT</i> | (7)        |
| KK2       |                    | <i>C. neoformans</i> | <i>MAT<math>\alpha</math> cnb1<math>\Delta</math>::NAT</i> | (7)        |
| SC5314    | MYA2876            | <i>C. albicans</i>   |                                                            | (8)        |
| 12553     | 10259              | <i>C. albicans</i>   |                                                            | (9)        |
| 12554     | 10261              | <i>C. albicans</i>   |                                                            | (9)        |
| 11282     | 10231              | <i>C. albicans</i>   |                                                            | (9)        |
| 50235     | 18804              | <i>C. albicans</i>   |                                                            | (10)       |
| 50539     | 66422              | <i>C. albicans</i>   |                                                            | This study |
| 50582     | 24433              | <i>C. albicans</i>   |                                                            | (11)       |
| YAG171    |                    | <i>C. albicans</i>   | <i>rbp1<math>\Delta</math>/rbp1<math>\Delta</math></i>     | (12)       |
| YAG237    |                    | <i>C. albicans</i>   | <i>CNB1-1/CNB1</i>                                         | (12)       |
| DAY364    |                    | <i>C. albicans</i>   | <i>cnb1<math>\Delta</math>/cnb1<math>\Delta</math></i>     | (12)       |
| Af293     | MYA4609            | <i>A. fumigatus</i>  |                                                            | (13)       |
| KCCM32791 | (Korean isolate)   | <i>A. fumigatus</i>  |                                                            | This study |

\*Gray shaded strains were used for the MIC assay.

## References

1. Perfect JR, Schell WA, Rinaldi MG. 1993. Uncommon invasive fungal pathogens in the acquired immunodeficiency syndrome. *J Med Vet Mycol* 31:175-9.
2. Bahn YS, Kojima K, Cox GM, Heitman J. 2005. Specialization of the HOG pathway and its impact on differentiation and virulence of *Cryptococcus neoformans*. *Mol Biol Cell* 16:2285-300.
3. Bovers M, Hagen F, Kuramae EE, Diaz MR, Spanjaard L, Dromer F, Hoogveld HL, Boekhout T. 2006. Unique hybrids between the fungal pathogens *Cryptococcus neoformans* and *Cryptococcus gattii*. *FEMS Yeast Res* 6:599-607.
4. Meyer W, Aanensen DM, Boekhout T, Cogliati M, Diaz MR, Esposto MC, Fisher M, Gilgado F, Hagen F, Kaocharoen S, Litvintseva AP, Mitchell TG, Simwami SP, Trilles L, Viviani MA, Kwon-Chung J. 2009. Consensus multi-locus sequence typing scheme for *Cryptococcus neoformans* and *Cryptococcus gattii*. *Med Mycol* 47:561-70.
5. Cheon SA, Jung KW, Chen YL, Heitman J, Bahn YS, Kang HA. 2011. Unique evolution of the UPR pathway with a novel bZIP transcription factor, Hx11, for controlling pathogenicity of *Cryptococcus neoformans*. *PLOS Pathog* 7:e1002177.
6. Cruz MC, Cavallo LM, Gorlach JM, Cox G, Perfect JR, Cardenas ME, Heitman J. 1999. Rapamycin antifungal action is mediated via conserved complexes with FKBP12 and TOR kinase homologs in *Cryptococcus neoformans*. *Mol Cell Biol* 19:4101-12.
7. Kojima K, Bahn YS, Heitman J. 2006. Calcineurin, Mpk1 and Hog1 MAPK pathways independently control fludioxonil antifungal sensitivity in *Cryptococcus neoformans*. *Microbiology* 152:591-604.
8. Fonzi WA, Irwin MY. 1993. Isogenic strain construction and gene mapping in *Candida albicans*. *Genetics* 134:717-28.
9. Balish E, Svihla G. 1968. Ultraviolet microscopy of purines and amino acids in the vacuole of *Candida albicans*. *J Bacteriol* 96:259-65.
10. de Barros PP, Rossoni RD, De Camargo Ribeiro F, Junqueira JC, Jorge AO. 2017. Temporal profile of biofilm formation, gene expression and virulence analysis in *Candida albicans* strains. *Mycopathologia* 182:285-295.
11. Uchida T, Kagoshima Y, Konosu T. 2009. Amide analogs of antifungal dioxane-triazole derivatives: synthesis and in vitro activities. *Bioorg Med Chem Lett* 19:2013-7.
12. Cruz MC, Goldstein AL, Blankenship JR, Del Poeta M, Davis D, Cardenas ME, Perfect JR, McCusker JH, Heitman J. 2002. Calcineurin is essential for survival during membrane stress in *Candida albicans*. *EMBO J* 21:546-59.
13. Nierman WC, Pain A, Anderson MJ, Wortman JR, Kim HS, Arroyo J, Berriman M, Abe K, Archer DB, Bermejo C, Bennett J, Bowyer P, Chen D, Collins M, Coulsen R, Davies R, Dyer PS, Farman M, Fedorova N, Fedorova N, Feldblyum TV, Fischer R, Fosker N, Fraser A, Garcia JL, Garcia MJ, Goble A, Goldman GH, Gomi K, Griffith-Jones S, Gwilliam R, Haas B, Haas H, Harris D, Horiuchi H, Huang J, Humphray S, Jimenez J, Keller N, Khouri H, Kitamoto K, Kobayashi T, Konzack S, Kulkarni R, Kumagai T, Lafton A, Latge J-P, Li W, Lord A, Lu C, et al. 2005. Genomic sequence of the pathogenic and allergenic filamentous fungus *Aspergillus fumigatus*. *Nature* 438:1151-1156.
